# Supplementary material for: Soil aggregation may be a relevant indicator of nutrient cation availability
Source: Springer Nature journal article supplement (doi:10.1007/s13595-018-0782-y), 2018-12-01

**Supplementary File 1:** X-ray diagrams of the clay fraction extracted from the <2mm class (fine earth) at AZ (Azerailles) and CA (Clermont en Argonne) for two soil horizons (0-10 cm and 100-120 cm). Ba, K, EG: saturations with barium, potassium, ethylene glycol, respectively. Tamura: specific pre-treatments to destabilize and quantify Al cements (Tamura, 1958).

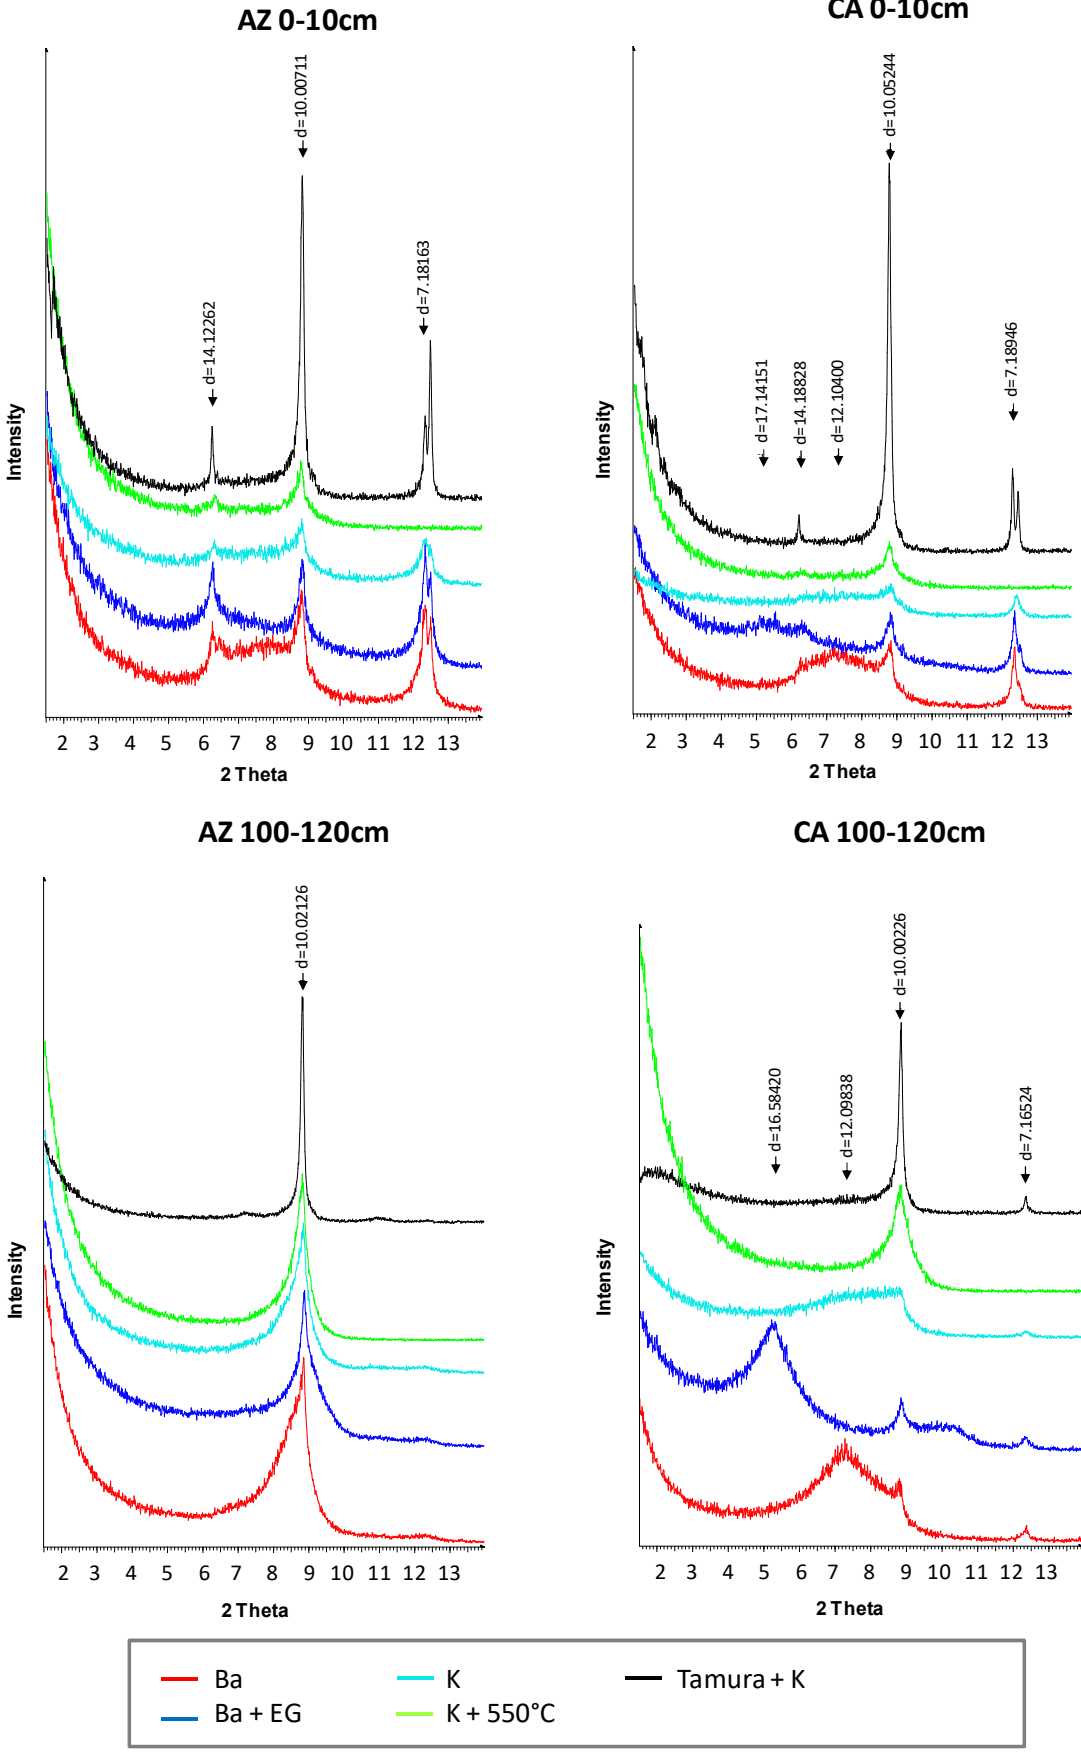

Supplement: MOESM1 [file 13595_2018_782_MOESM1_ESM.pdf]
