# Supplementary material for: Soil aggregation may be a relevant indicator of nutrient cation availability
Source: Springer Nature journal article supplement (doi:10.1007/s13595-018-0782-y), 2018-12-01
Supplement: MOESM2 [file 13595_2018_782_MOESM2_ESM.pdf]

**Supplementary File 2:** Mineralogy of the clay fraction (<2 μm) of the soils at the two sites.

K: Kaolinite, I: Illite, V: Vermiculite, C: Chlorite, S: Smectite.

| <b>Site</b>                         | <b>Depth<br/>cm</b> | <b>Identified clay minerals</b>       |
|-------------------------------------|---------------------|---------------------------------------|
| <b>Azerailles (AZ)</b>              | <b>0-10</b>         | K ; I ; V ; C ; Al-intergrades        |
|                                     | <b>10-20</b>        | K ; I ; V ; C ; I/V                   |
|                                     | <b>30-45</b>        | K ; I ; V ; C ; I/V                   |
|                                     | <b>100-120</b>      | I ; (K)                               |
| <b>Clermont en<br/>Argonne (CA)</b> | <b>0-10</b>         | K ; I ; V ; S ; I/S ; Al-intergrades. |
|                                     | <b>10-20</b>        | K ; I ; V ; S ; I/S ; Al-intergrades. |
|                                     | <b>30-45</b>        | K ; I ; V ; S ; I/S ; Al-intergrades. |
|                                     | <b>100-120</b>      | K ; I ; S ; I/S                       |
