# Supplementary material for: Soil aggregation may be a relevant indicator of nutrient cation availability
Source: Springer Nature journal article supplement (doi:10.1007/s13595-018-0782-y), 2018-12-01
Supplement: MOESM3 [file 13595_2018_782_MOESM3_ESM.pdf]

**Supplementary File 3:** Carbon, nitrogen and exchangeable element contents (Exch.) in the different aggregate size classes and in the <2 mm class at the two sites. For Ca and Mg, total element contents and ratios between exchangeable and total elements are also indicated. L.Q.= Limit of Quantification. Samples were collected in one pit per site; four replicates (one per pit face) were collected at each depth and pooled in the field.

| Site                     | Depth<br>cm         | Sample                     | N<br>% | C<br>% | C:N   | Exch. Al<br>$\mu\text{g.g}^{-1}$ | Exch. Fe<br>$\mu\text{g.g}^{-1}$ | Exch. K<br>$\mu\text{g.g}^{-1}$ | Exch. Mn<br>$\mu\text{g.g}^{-1}$ | Exch. Na<br>$\mu\text{g.g}^{-1}$ | Exch. Ca<br>$\mu\text{g.g}^{-1}$ | Total Ca<br>$\mu\text{g.g}^{-1}$ | Ca<br>Exch :Tot | Exch. Mg<br>$\mu\text{g.g}^{-1}$ | Total Mg<br>$\mu\text{g.g}^{-1}$ | Mg<br>Exch :Tot |
|--------------------------|---------------------|----------------------------|--------|--------|-------|----------------------------------|----------------------------------|---------------------------------|----------------------------------|----------------------------------|----------------------------------|----------------------------------|-----------------|----------------------------------|----------------------------------|-----------------|
| Azerailles (AZ)          | 0-10                | Ag. 200-2000 $\mu\text{m}$ | 0.21   | 3.3    | 15.7  | 1.0                              | 1.4                              | 100.8                           | 281.4                            | 1.6                              | 463.3                            | 1030                             | 45.0            | 80.2                             | 1748                             | 4.6             |
|                          |                     | Ag. 50-200 $\mu\text{m}$   | 0.18   | 2.7    | 15.4  | 1.0                              | 2.0                              | 78.8                            | 377.8                            | 1.1                              | 406.7                            | 1657                             | 24.5            | 73.1                             | 1989                             | 3.7             |
|                          |                     | Ag. <50 $\mu\text{m}$      | 0.19   | 2.3    | 12.0  | 0.7                              | 1.6                              | 135.3                           | 186.6                            | 12.7                             | 486.7                            | 1343                             | 36.2            | 93.7                             | 2677                             | 3.5             |
|                          |                     | Soil <2 mm calculated      | -      | -      | -     | -                                | -                                | -                               | -                                | -                                | -                                | 445.2                            | 1276            | 34.9                             | 82.8                             | 2097            |
|                          | 10-20               | Ag. 200-2000 $\mu\text{m}$ | 0.11   | 1.5    | 14.2  | 0.4                              | 0.4                              | 39.2                            | 30.3                             | 5.9                              | 218.1                            | 820                              | 26.6            | 46.2                             | 1732                             | 2.7             |
|                          |                     | Ag. 50-200 $\mu\text{m}$   | 0.06   | 0.9    | 15.6  | 0.0                              | 0.3                              | 27.7                            | 18.4                             | 2.6                              | 202.7                            | 1444                             | 14.0            | 43.0                             | 1523                             | 2.8             |
|                          |                     | Ag. <50 $\mu\text{m}$      | 0.10   | 1.0    | 10.3  | 0.0                              | 0.3                              | 64.3                            | 21.0                             | 6.4                              | 523.3                            | 1491                             | 35.1            | 117.4                            | 3111                             | 3.8             |
|                          |                     | Soil <2 mm calculated      | -      | -      | -     | -                                | -                                | -                               | -                                | -                                | -                                | 378.2                            | 1290            | 29.3                             | 83.6                             | 2430            |
|                          | 30-45               | Ag. 200-2000 $\mu\text{m}$ | 0.08   | 1.1    | 14.8  | 0.0                              | 0.3                              | 43.0                            | 12.7                             | 4.2                              | 413.3                            | 1023                             | 40.4            | 91.8                             | 2449                             | 3.7             |
|                          |                     | Ag. 50-200 $\mu\text{m}$   | 0.04   | 0.5    | 13.7  | 0.3                              | 0.3                              | 25.5                            | 9.3                              | 1.5                              | 279.7                            | 1820                             | 15.4            | 58.3                             | 1893                             | 3.1             |
|                          |                     | Ag. <50 $\mu\text{m}$      | 0.09   | 0.8    | 8.9   | 0.0                              | 0.3                              | 97.0                            | 21.4                             | 9.7                              | 860.0                            | 1411                             | 60.9            | 190.7                            | 1877                             | 10.2            |
|                          |                     | Soil <2 mm calculated      | -      | -      | -     | -                                | -                                | -                               | -                                | -                                | -                                | 588.7                            | 1431            | 41.1                             | 129.5                            | 2021            |
| 100-120                  | Soil <2 mm measured | 0.03                       | 0.1    | 4.9    | <L.Q. | 0.3                              | 110.8                            | 3.9                             | 14.5                             | 736.7                            | 832                              | 88.5                             | 260.1           | 3304                             | 7.9                              |                 |
| Clermont en Argonne (CA) | 0-10                | Ag. 200-2000 $\mu\text{m}$ | 0.08   | 2.4    | 28.5  | 5.8                              | 8.7                              | 44.5                            | 3.0                              | 0.3                              | 23.5                             | 857                              | 2.7             | 6.5                              | 1100                             | 0.6             |
|                          |                     | Ag. 50-200 $\mu\text{m}$   | 0.03   | 0.7    | 21.5  | 1.4                              | 3.1                              | 17.9                            | 0.9                              | <L.Q.                            | 7.8                              | 724                              | 1.1             | 2.3                              | 608                              | 0.4             |
|                          |                     | Ag. <50 $\mu\text{m}$      | 0.22   | 4.7    | 21.9  | 21.8                             | 20.9                             | 138.5                           | 6.8                              | 4.4                              | 72.7                             | 620                              | 11.7            | 20.4                             | 2297                             | 0.9             |
|                          |                     | Soil <2 mm calculated      | -      | -      | -     | -                                | -                                | -                               | -                                | -                                | -                                | 27.6                             | 731             | 3.8                              | 7.8                              | 1144            |
|                          | 10-20               | Ag. 200-2000 $\mu\text{m}$ | 0.07   | 2.7    | 37.5  | 5.5                              | 1.6                              | 36.6                            | 9.7                              | 0.6                              | 10.5                             | 907                              | 1.2             | 3.7                              | 1421                             | 0.3             |
|                          |                     | Ag. 50-200 $\mu\text{m}$   | 0.04   | 0.6    | 16.0  | 1.1                              | 0.6                              | 19.8                            | 28.5                             | <L.Q.                            | 8.3                              | 998                              | 0.8             | 2.7                              | 950                              | 0.3             |
|                          |                     | Ag. <50 $\mu\text{m}$      | 0.18   | 3.3    | 18.3  | 40.0                             | 5.7                              | 147.5                           | 34.7                             | 6.2                              | 45.0                             | 365                              | 12.3            | 16.3                             | 2077                             | 0.8             |
|                          |                     | Soil <2 mm calculated      | -      | -      | -     | -                                | -                                | -                               | -                                | -                                | -                                | 15.7                             | 864             | 1.8                              | 5.5                              | 1223            |
|                          | 30-45               | Ag. 200-2000 $\mu\text{m}$ | 0.04   | 0.4    | 10.3  | 6.4                              | 0.3                              | 104.7                           | 2.6                              | 4.5                              | 119.0                            | 691                              | 17.2            | 32.5                             | 4152                             | 0.8             |
|                          |                     | Ag. 50-200 $\mu\text{m}$   | 0.02   | 0.2    | 11.0  | 0.3                              | 0.1                              | 20.0                            | 0.5                              | <L.Q.                            | 15.3                             | 734                              | 2.1             | 5.9                              | 1312                             | 0.4             |
|                          |                     | Ag. <50 $\mu\text{m}$      | 0.06   | 0.5    | 9.2   | 10.5                             | 0.5                              | 140.3                           | 3.0                              | 7.7                              | 99.3                             | 809                              | 12.3            | 38.8                             | 3922                             | 1.0             |
|                          |                     | Soil <2 mm calculated      | -      | -      | -     | -                                | -                                | -                               | -                                | -                                | -                                | 69.0                             | 756             | 9.1                              | 24.3                             | 2909            |
| 100-120                  | Soil <2 mm measured | 0.02                       | 0.1    | 2.8    | 0.3   | 0.3                              | 178.3                            | 0.2                             | 30.4                             | 886.7                            | 1034                             | 85.8                             | 257.1           | 4436                             | 5.8                              |                 |
