# Supplementary material for: Soil aggregation may be a relevant indicator of nutrient cation availability
Source: Springer Nature journal article supplement (doi:10.1007/s13595-018-0782-y), 2018-12-01
Supplement: MOESM4 [file 13595_2018_782_MOESM4_ESM.pdf]

**Supplementary File 4:** Particles size distribution in the different aggregate size classes according to depth at the two sites. Samples were collected in one pit per site; four replicates (one per pit face) were collected at each depth and pooled in the field.

| Site            | Depth<br><i>cm</i>          | Aggregates size<br><i>μm</i> | Clay<br><i>g.kg<sup>-1</sup></i> | Fine silt<br><i>g.kg<sup>-1</sup></i> | Coarse silt<br><i>g.kg<sup>-1</sup></i> | Fine sands<br><i>g.kg<sup>-1</sup></i> | Coarse sands<br><i>g.kg<sup>-1</sup></i> |   |
|-----------------|-----------------------------|------------------------------|----------------------------------|---------------------------------------|-----------------------------------------|----------------------------------------|------------------------------------------|---|
| Azerailles (AZ) | 0-10                        | 200-2000                     | 141                              | 237                                   | 132                                     | 57                                     | 433                                      |   |
|                 |                             | 50-200                       | 157                              | 330                                   | 272                                     | 241                                    | -                                        |   |
|                 |                             | <50                          | 261                              | 542                                   | 196                                     | -                                      | -                                        |   |
|                 | 10-20                       | 200-2000                     | 115                              | 200                                   | 96                                      | 49                                     | 540                                      |   |
|                 |                             | 50-200                       | 91                               | 281                                   | 338                                     | 290                                    | -                                        |   |
|                 |                             | <50                          | 288                              | 459                                   | 253                                     | -                                      | -                                        |   |
|                 | 30-45                       | 200-2000                     | 158                              | 162                                   | 80                                      | 47                                     | 553                                      |   |
|                 |                             | 50-200                       | 89                               | 287                                   | 398                                     | 226                                    | -                                        |   |
|                 |                             | <50                          | 388                              | 497                                   | 114                                     | -                                      | -                                        |   |
|                 | 100-110                     | Total Soil                   | 725                              | 205                                   | 22                                      | 20                                     | 28                                       |   |
|                 | Clermont en<br>Argonne (CA) | 0-10                         | 200-2000                         | 97                                    | 312                                     | 375                                    | 207                                      | 8 |
|                 |                             |                              | 50-200                           | 38                                    | 253                                     | 414                                    | 295                                      | - |
| <50             |                             |                              | 189                              | 599                                   | 212                                     | -                                      | -                                        |   |
| 10-20           |                             | 200-2000                     | 119                              | 300                                   | 356                                     | 205                                    | 20                                       |   |
|                 |                             | 50-200                       | 32                               | 268                                   | 465                                     | 234                                    | -                                        |   |
|                 |                             | <50                          | 299                              | 619                                   | 82                                      | -                                      | -                                        |   |
| 30-45           |                             | 200-2000                     | 511                              | 216                                   | 193                                     | 70                                     | 9                                        |   |
|                 |                             | 50-200                       | 85                               | 129                                   | 474                                     | 312                                    | -                                        |   |
|                 |                             | <50                          | 461                              | 445                                   | 94                                      | -                                      | -                                        |   |
| 100-110         |                             | Total Soil                   | 305                              | 185                                   | 76                                      | 346                                    | 88                                       |   |
