# Supplementary material for: Soil aggregation may be a relevant indicator of nutrient cation availability
Source: Springer Nature journal article supplement (doi:10.1007/s13595-018-0782-y), 2018-12-01
Supplement: MOESM5 [file 13595_2018_782_MOESM5_ESM.pdf]

**Supplementary File 5: Clay mineralogy as a function of aggregate class, soil horizon and site.**

AZ=Azerailles; CA=Clermont en Argonne; Black = Class [200-2000 $\mu$ m]; Dark grey = Class [50-200 $\mu$ m]; Light grey = class [0-50 $\mu$ ]. Ba, K, EG: saturations with barium, potassium, ethylene glycol, respectively. Tamura: specific pre-treatments to destabilize and quantify Al cements (Tamura, 1958).

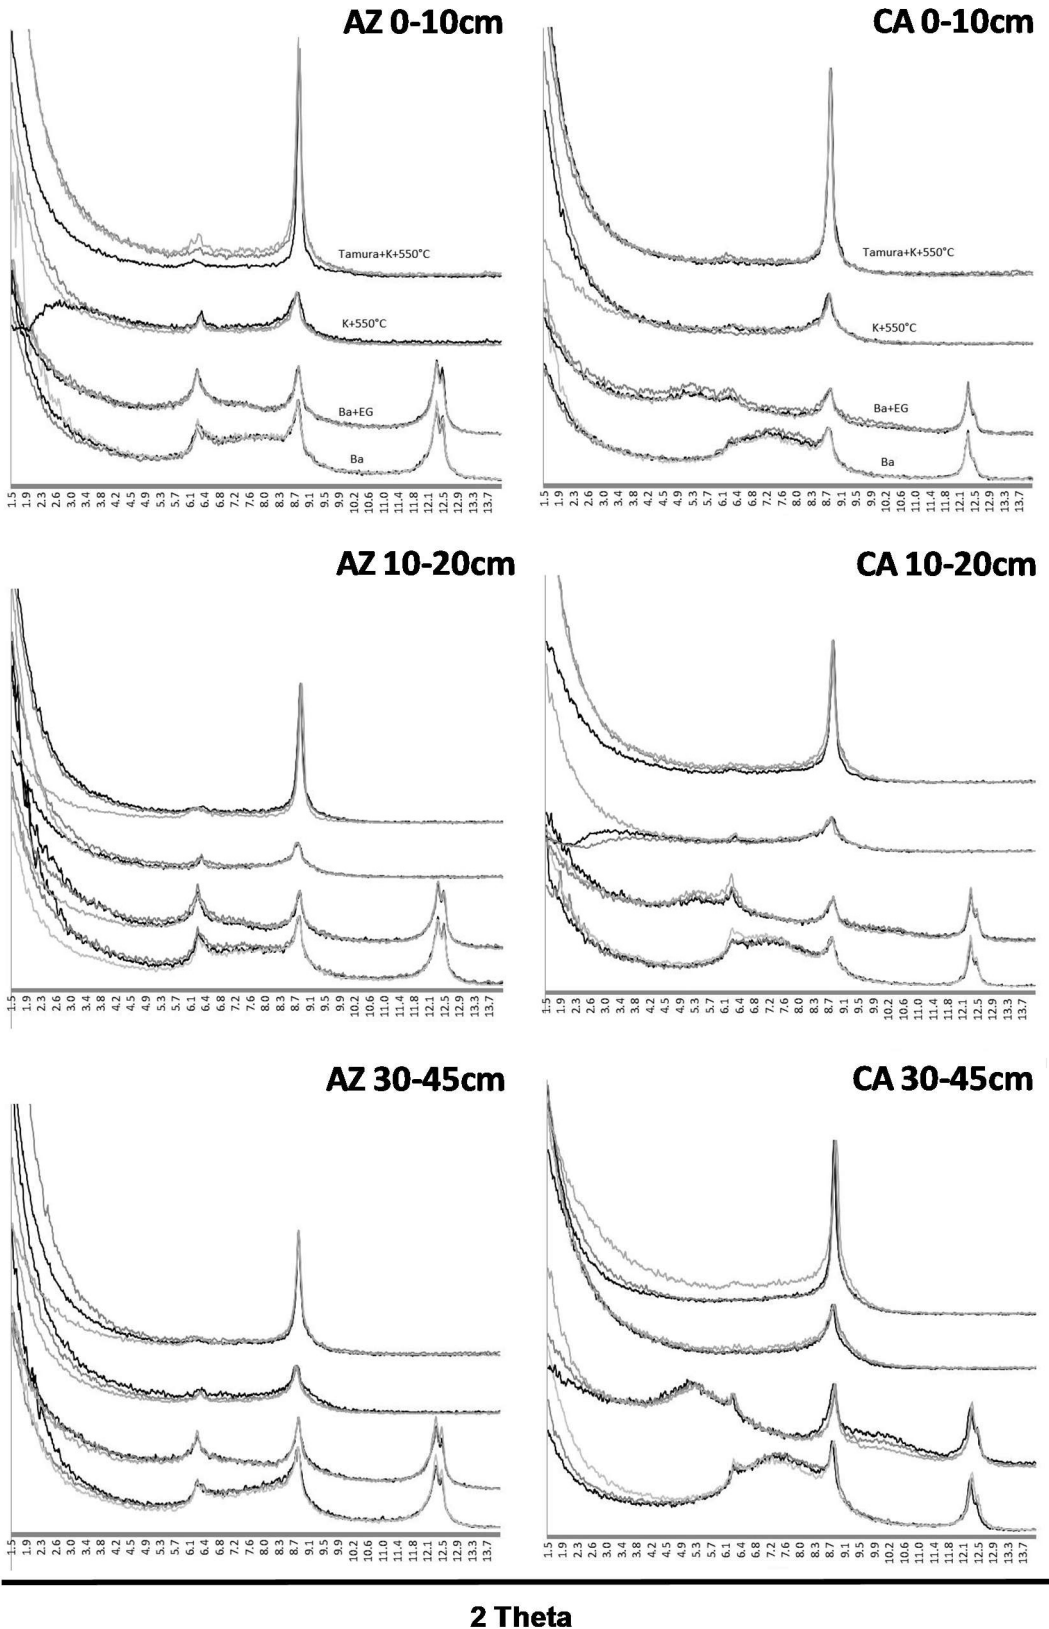

2 Theta
