# Supplementary material for: Soil aggregation may be a relevant indicator of nutrient cation availability
Source: Springer Nature journal article supplement (doi:10.1007/s13595-018-0782-y), 2018-12-01

**Supplementary File 6:** Soil cationic exchange capacity (CEC) estimated from weighted aggregate composition compared to the soil CEC measured on the <2mm class (fine earth) using the cobalthexamine extraction method. AZ=Azerailles; CA=Clermont en Argonne. Deep layer = 100-120cm.

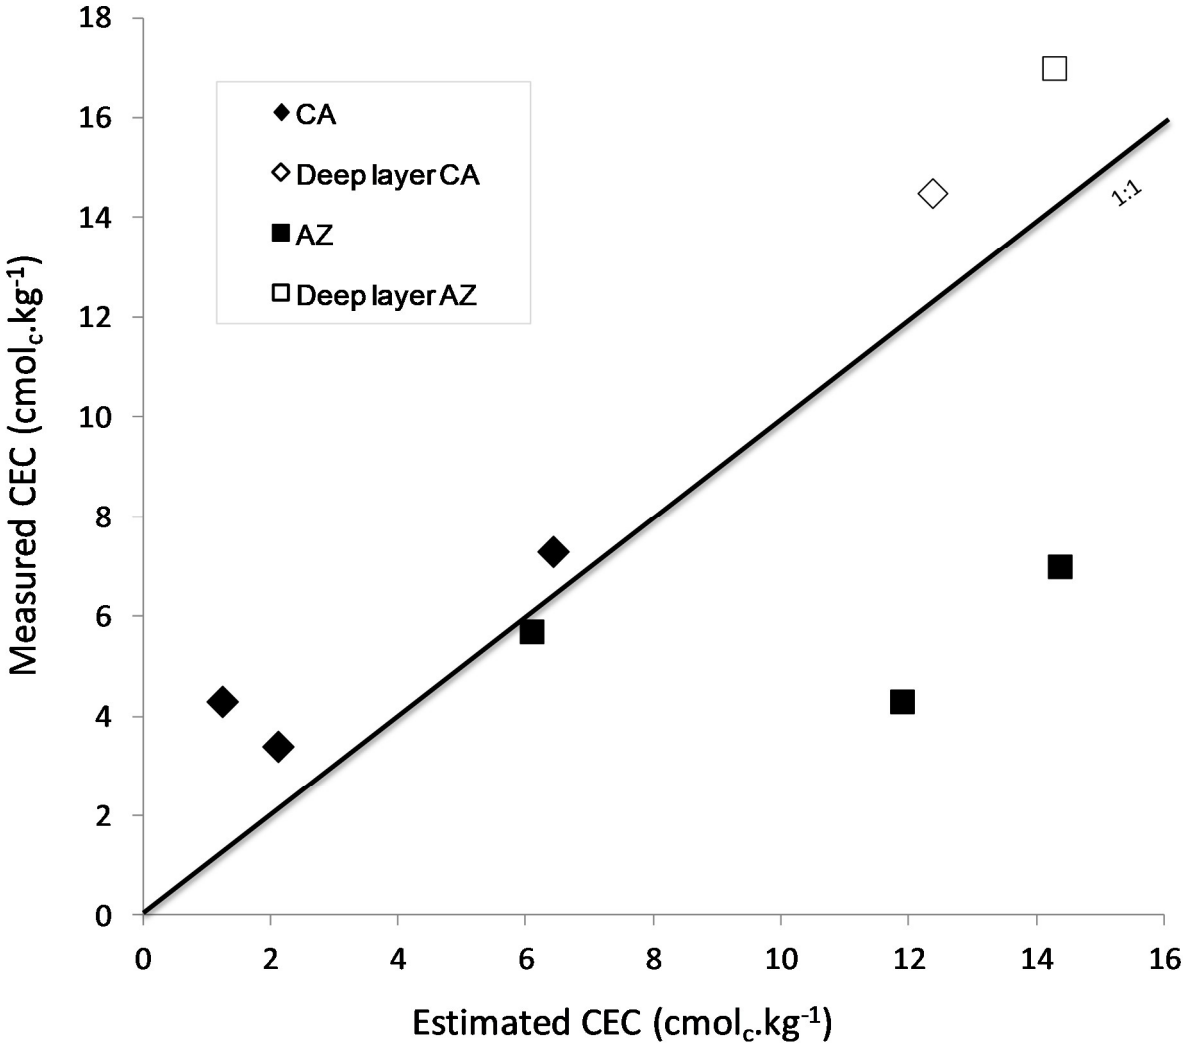

Supplement: MOESM6 [file 13595_2018_782_MOESM6_ESM.pdf]
